# Supplementary material
Source: publisher figshare collection journal article supplement (https://sage.figshare.com/ndownloader/files/13380641)
Supplement: Supplementary file 1 [file 13380641]

## Supplementary Figure legends

**Supplementary Figure 1. Co-treatment with tamoxifen and paclitaxel, vincristine, or bortezomib did not affect body weight in mice.** Safety of paclitaxel, vincristine, or bortezomib and tamoxifen administrated in vivo. (a) Paclitaxel (6 mg/kg, n = 15), (b) vincristine (0.2 mg/kg, n = 15), or (c) bortezomib (1 mg/kg, n = 15) were administrated i.p. weekly for 2 weeks (days 0 and 7). Tamoxifen (30 mg/kg, n = 15) was administrated p.o. daily for 14 days. Mice were weighed before the first treatment and daily for the duration of treatment. Means and S.E.M. are shown.

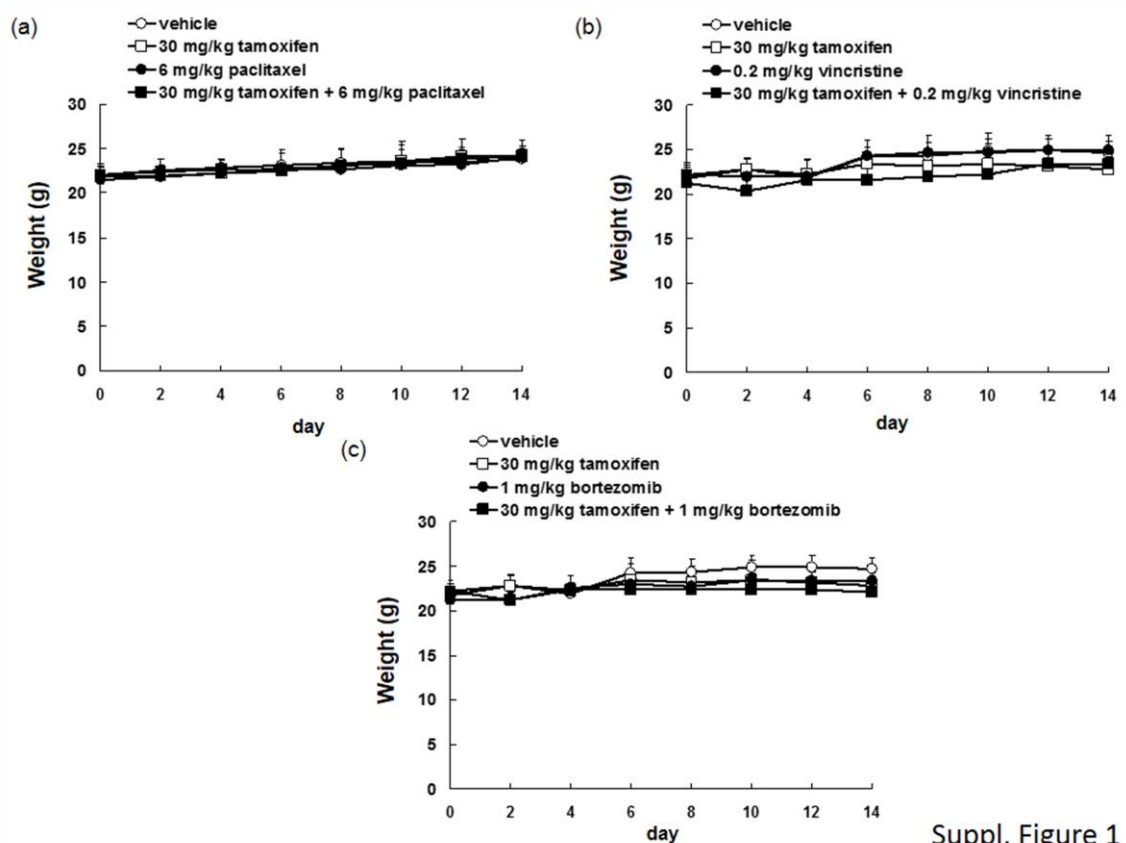

Suppl. Figure 1
